# Supplementary material
Source: ML conference proceedings conference paper supplement (https://openaccess.thecvf.com/content/CVPRW_2020/html/Coppola_Interpreting_Mechanisms_of_CVPRW_2020_paper.html)
Supplement: Supplementary file 1 [file Coppola_Interpreting_Mechanisms_of_CVPRW_2020_supplemental.zip]

Archive with 2 entries (2 files):
- 23-rebuttal.pdf
- 23-supp.pdf
